# Supplementary material for: A reduced polydopamine nanoparticle-coupled sprayable PEG hydrogel adhesive with anti-infection activity for rapid wound sealing
Source: Royal Society of Chemistry journal article supplement (doi:10.1039/d0bm01213k), 2020-01-01
Supplement: d0bm01213k1.pdf [file d0bm01213k1.pdf]

## Reduced Polydopamine Nanoparticle-coupled Sprayable PEG Hydrogel Adhesive for Rapid Wound Sealing and Anti-infection

Junjie Sun<sup>a</sup>, Haoqi Tan<sup>a</sup>, Huan Liu<sup>a</sup>, Dawei Jin<sup>b</sup>, Meng Yin<sup>b</sup>, Haodong Lin<sup>c,\*</sup>, Xue Qu<sup>a,\*</sup> and Changsheng Liu<sup>a,\*</sup>

Corresponding Author: Xue Qu, Haodong Lin, Changsheng Liu  
Contact email: quxue@ecust.edu.cn

<sup>a</sup> Key Laboratory for Ultrafine Materials of Ministry of Education, Frontiers Science Center for Materiobiology and Dynamic Chemistry, School of material science and engineering, East China University of Science and Technology, Shanghai 200237, China

<sup>b</sup> Department of Cardiothoracic Surgery, Shanghai Children's Medical Center, School of Medicine, Shanghai Jiao Tong University, 1678 Dong Fang Road, Shanghai, 200127, China

<sup>c</sup> Department of Orthopedic Surgery, Shanghai General Hospital, Shanghai Jiaotong University School of Medicine, Shanghai, 200080, China

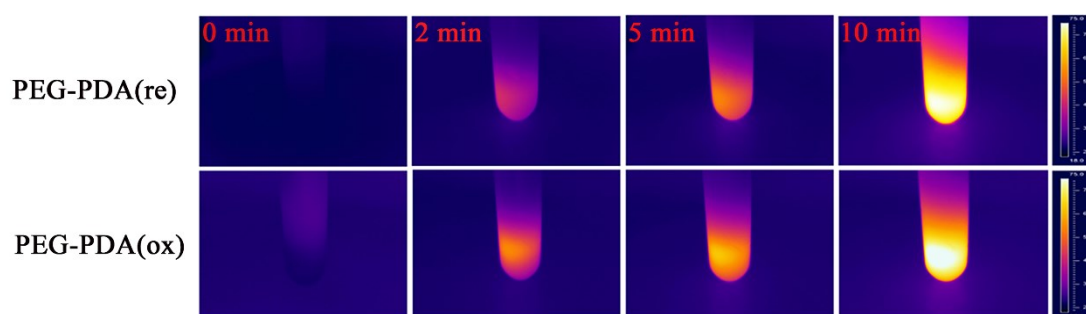

**Figure S1.** Infrared thermal images of PEG-PDA(re) and PEG-PDA(ox) hydrogels immersed into PBS aqueous solution under 808 nm light irradiation for 10 min.

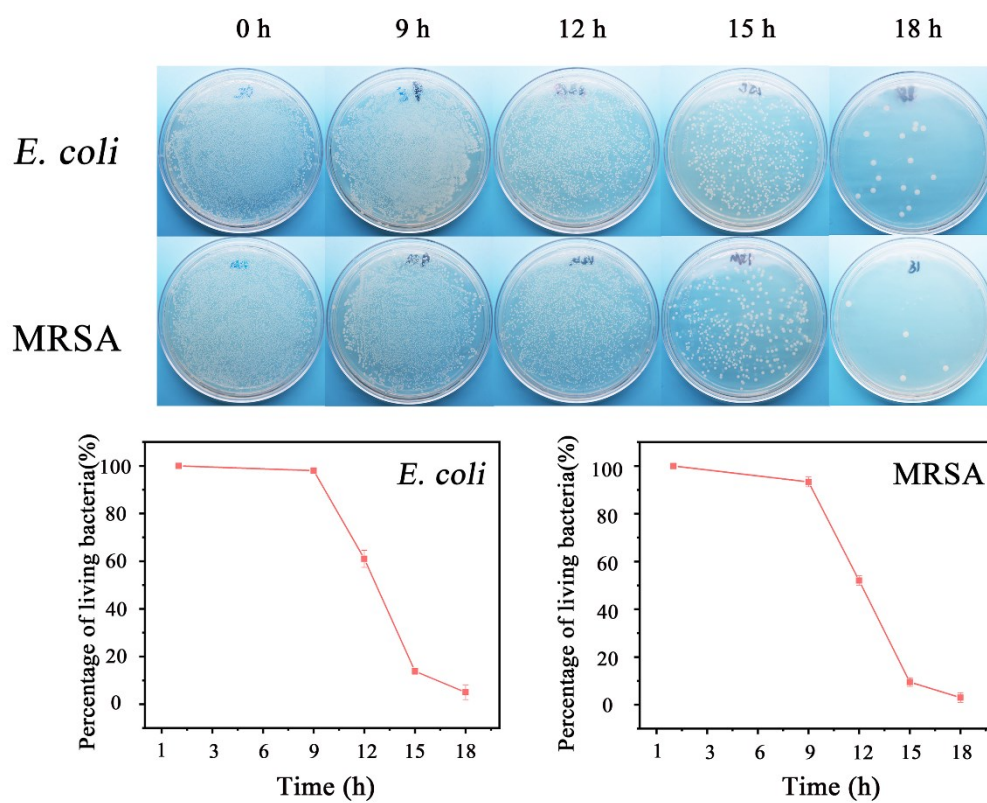

**Figure S2.** The bactericidal kinetics of PEG-PDA(re) hydrogel within 18 h.

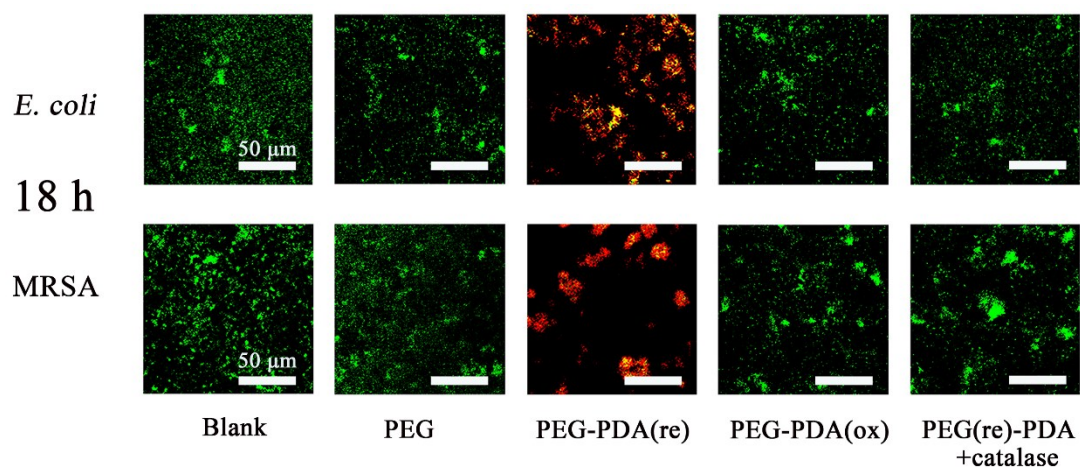

**Figure S3.** Live and dead staining images of *E. coli* and MRSA incubated with different hydrogels, scale bar is 50  $\mu\text{m}$ .
